# Supplementary material
Source: PubMed Central journal article supplement (PMC6533615)
Supplement: NIHMS1024140-supplement-Supplemental_File.pdf [file NIHMS1024140-supplement-Supplemental_File.pdf]

# Distributed Learning from Multiple EHR Databases: Contextual Embedding Models for Medical Events

Supplementary materials

Ziyi Li<sup>1</sup>, Kirk Roberts<sup>2</sup>, Xiaoqian Jiang<sup>2,\*</sup> and Qi Long<sup>3,\*</sup>

<sup>1</sup>Emory University, Department of Biostatistics and Bioinformatics, Atlanta, GA 30332, USA

<sup>2</sup>University of Texas, Health Science Center at Houston, School of Biomedical Informatics, Houston, Texas 77030, USA

<sup>3</sup>University of Pennsylvania, Perelman School of Medicine, Department of Biostatistics and Epidemiology, Philadelphia, PA 19104, USA

\*Xiaoqian Jiang (Xiaoqian.Jiang@uth.tmc.edu) and Qi Long (qlong@pennmedicine.upenn.edu) are joint corresponding authors.

February 11, 2019

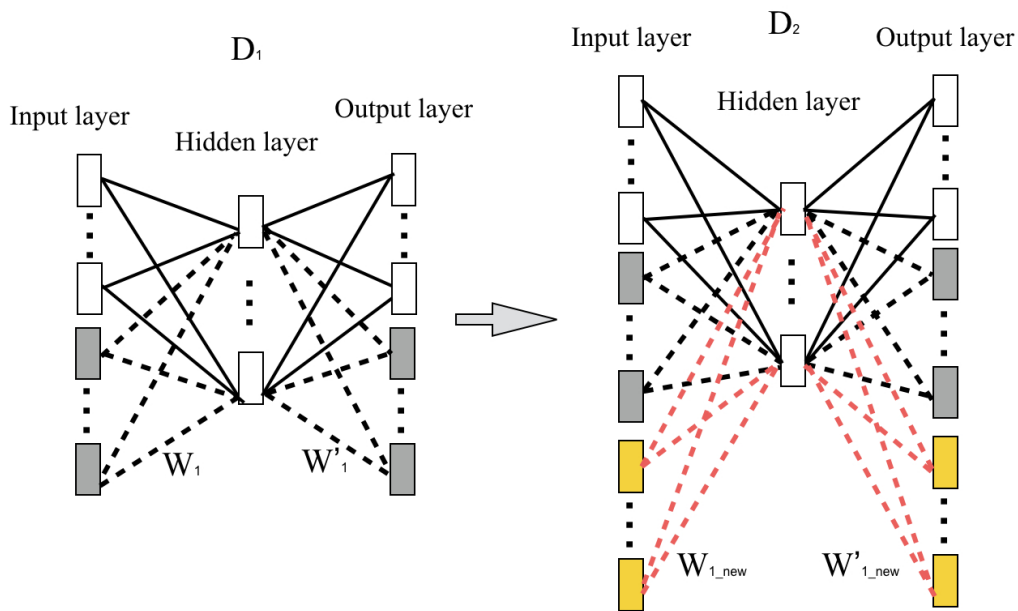

Figure S1: Naive updates. Left figure represents  $M_1$  and right figure represents  $M_2$ . Empty squares represent the words exclusive to  $D_1$ . Gray squares are the words shared by both  $D_1$  and  $D_2$ . Yellow squares are the words exclusive to  $D_2$ .

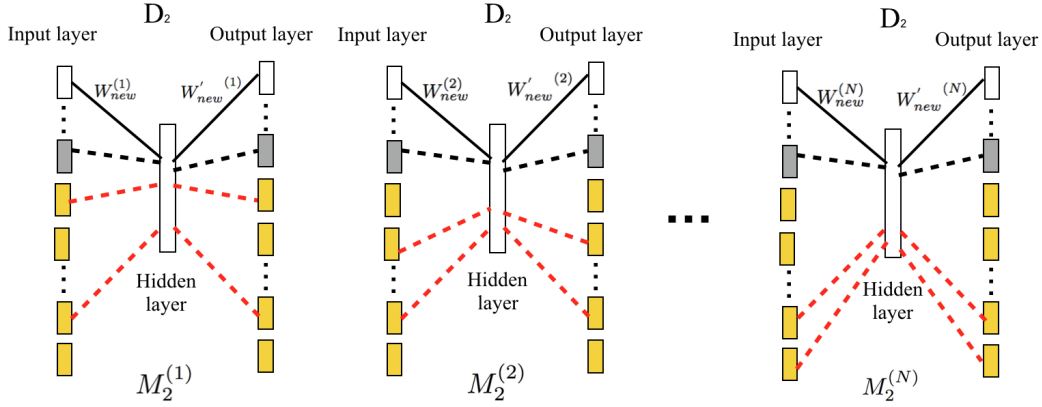

Figure S2: Dropout updates. This figure only demonstrate the second step in dropout updates, which is to update existing model using new dataset  $D_2$ . Empty squares represent the words exclusive to  $D_1$ . Gray squares are the words shared by both  $D_1$  and  $D_2$ . Yellow squares are the words exclusive to  $D_2$ . When a node is not connected to hidden layer, it means this node is 'dropped' for the current training cycle.

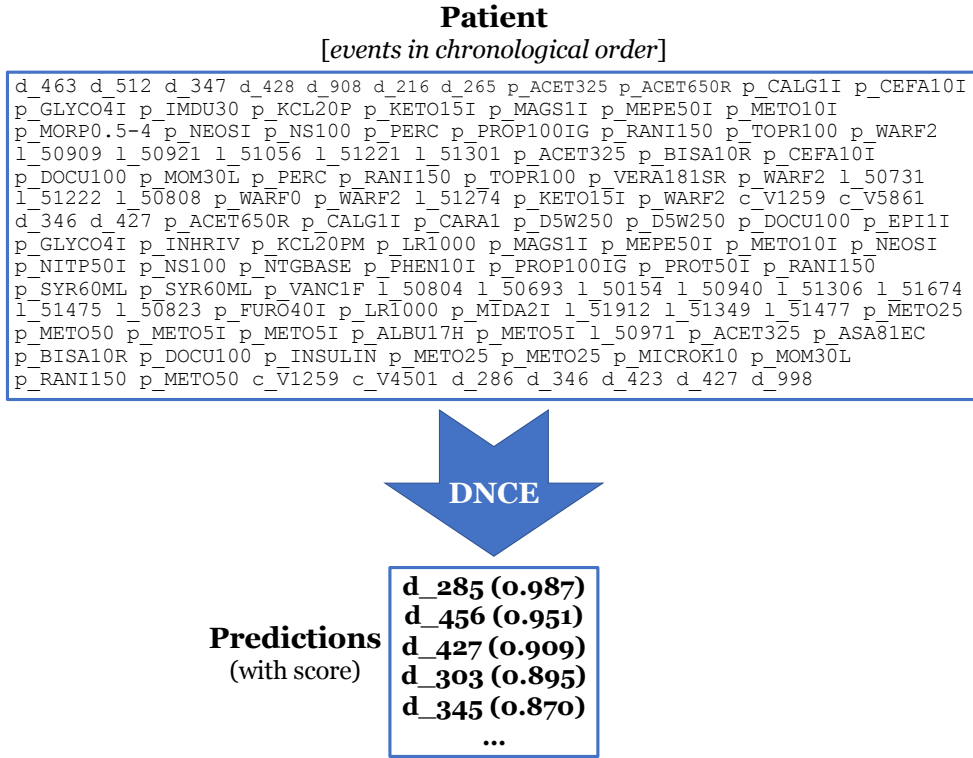

Figure S3: A schematic plot to demonstrate the input and output of the proposed model. In this plot we demonstrate a sequence from one patient,  $d_*$  represent real diagnoses that were on record.  $l_*$  are events for lab tests.  $p_*$  are prescription event. Other possible events (not present in this patient) include  $s_*$  for symptoms and  $c_*$  for conditions.

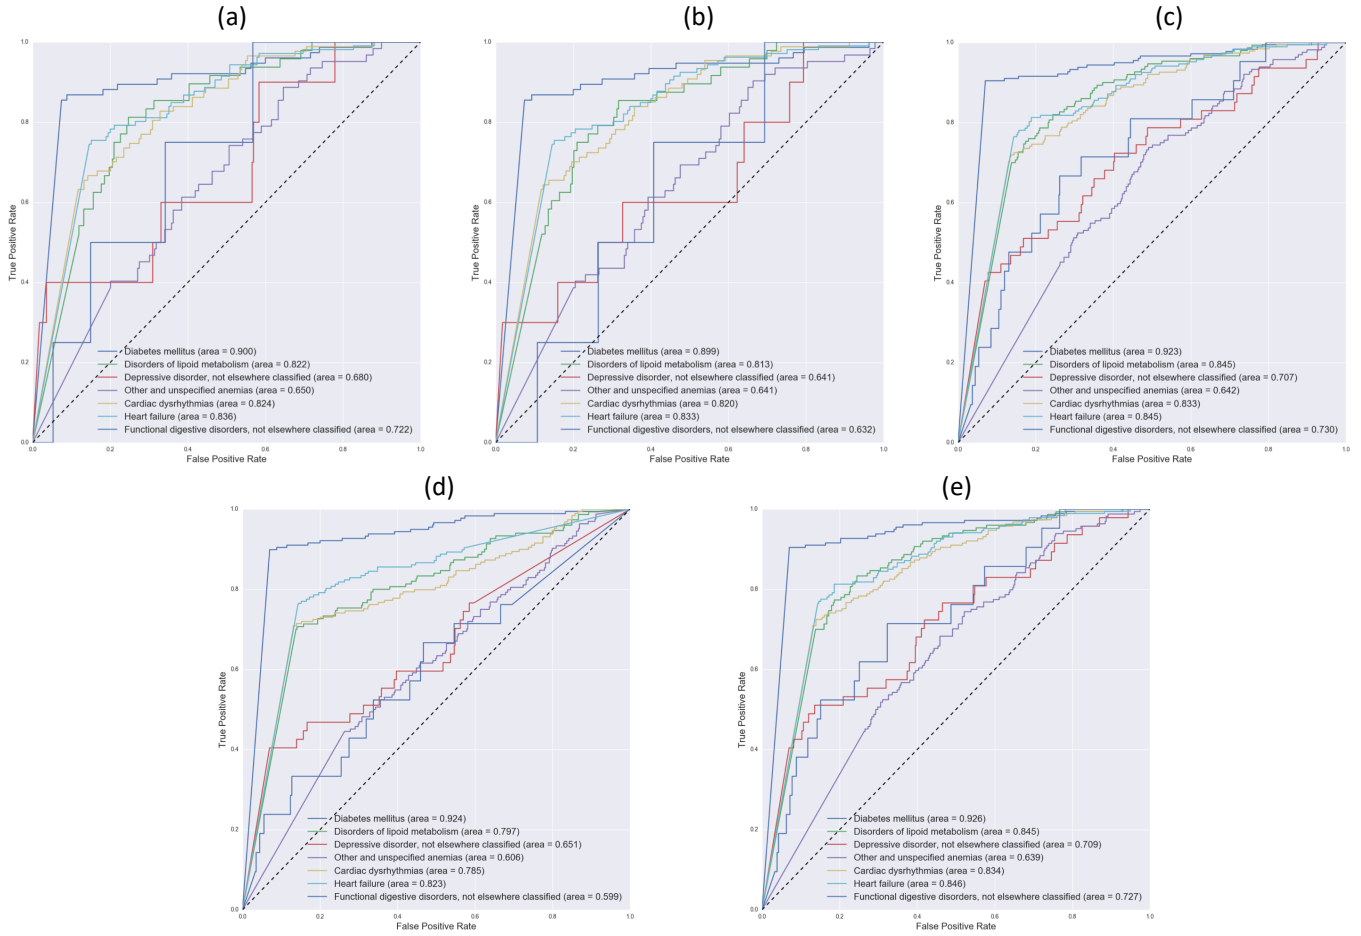

Figure S4: ROC curves for the top 7 most common diagnoses. Figure (a) is the results by PDPS using only the data from CareVue. Figure (b) is by PDPS using only the data from MetaVision. Figure (c), (d), and (e) are by Naive, Dropout, and DNCE algorithm respectively using both CareVue and MetaVision.

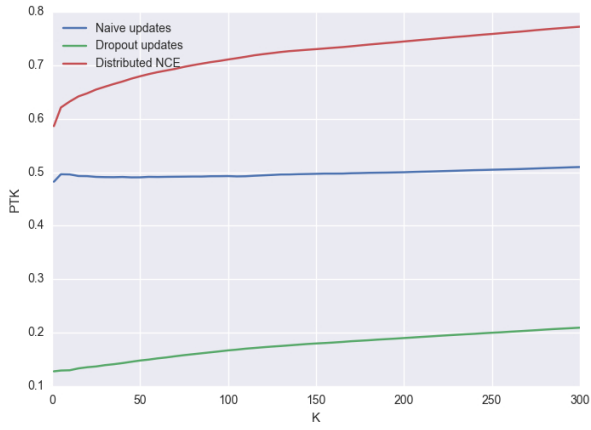

(a) PTK vs. K : 10% + 80% training data

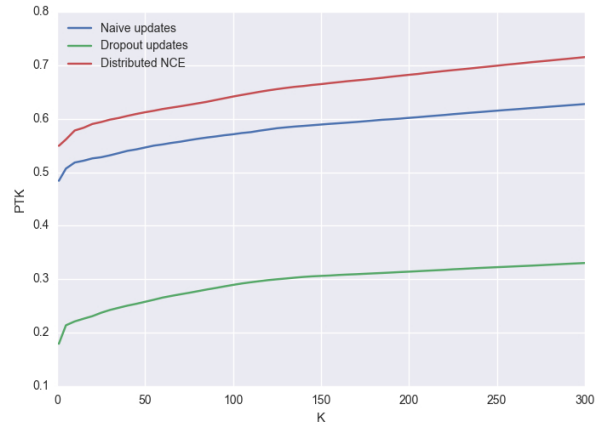

(b) PTK vs. K : 45% + 45% training data

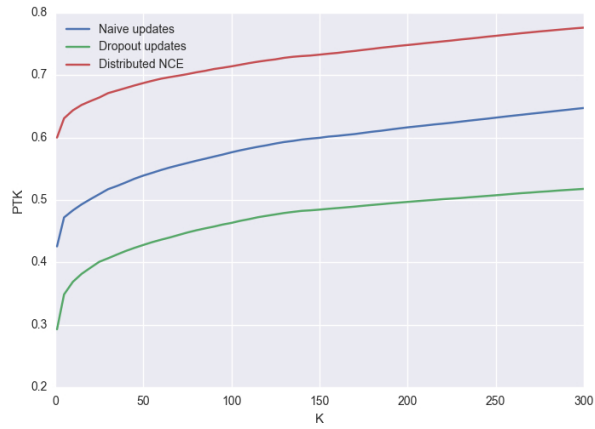

(c) PTK vs. K : 80% + 10% training data

Figure S5: Precision-top-K versus K for all methods

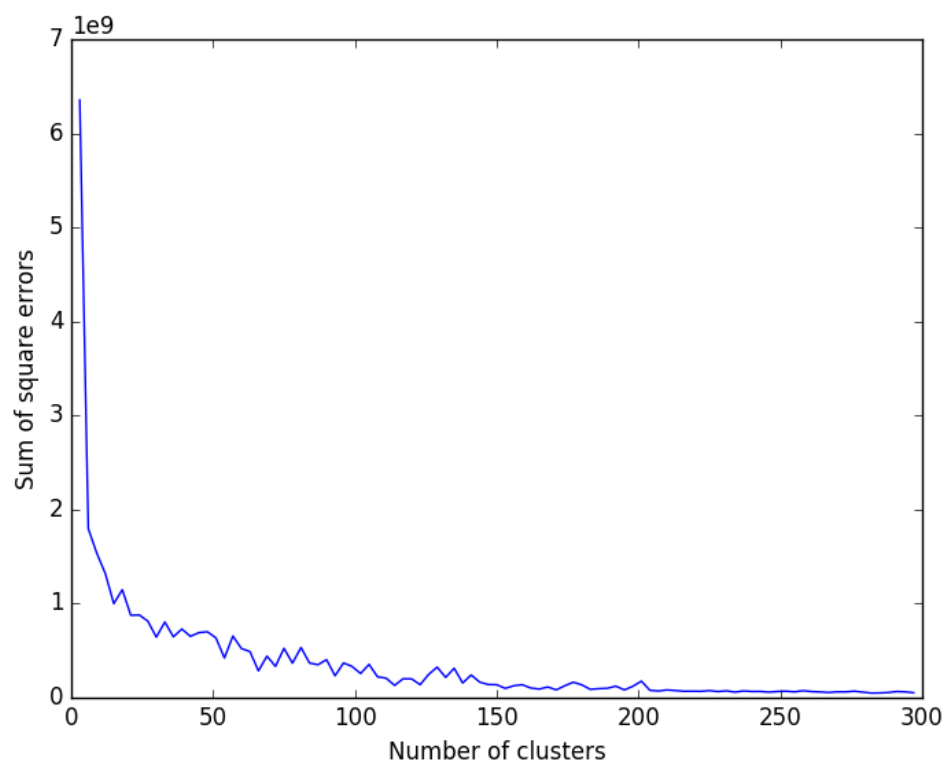

Figure S6: Sum of Squared Errors (with noise-added centroids) by Number of Clusters.

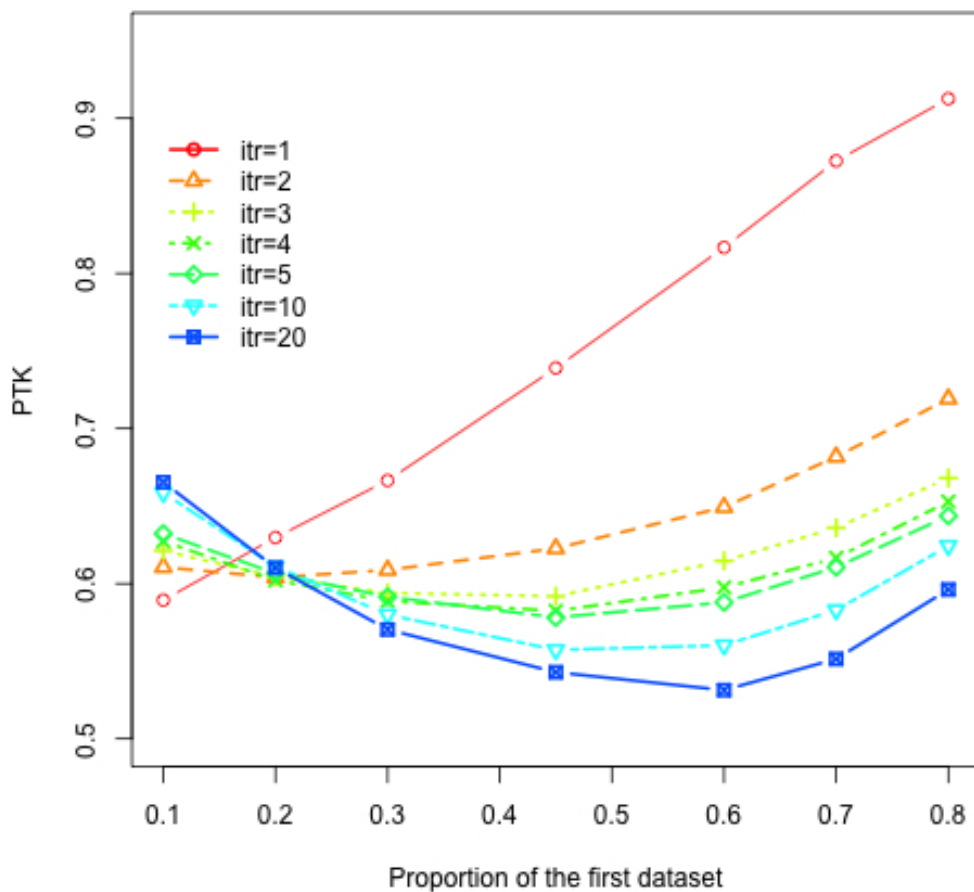

Figure S7: Precision-Top-K versus K by Distributed NCE using different training-set-partitions for different number of iterations. X-axis is the proportion of first training set. The first and second training sets add up to 90% of total data. All Distributed NCE models are compared with gold standard model, which is defined as global model trained with all the training data (90% of data).

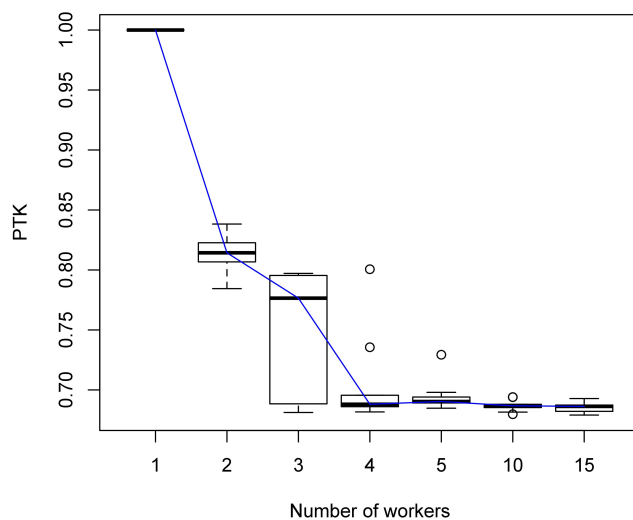

Figure S8: Boxplot of PTK between two global models versus Number of workers. Each box include the PTK values of two repetitive global models using ten-fold cross validation training data. Blue line connects group median.

| Total Number | Diagnostic                                             | Freq | Prescription | Freq (Person) | Lab tests         | Freq (Person) | Symptom                   | Freq (Person) | Condition                 | Freq (Person) |
|--------------|--------------------------------------------------------|------|--------------|---------------|-------------------|---------------|---------------------------|---------------|---------------------------|---------------|
|              | 712                                                    |      | 3553         |               | 1138              |               | 174                       |               | 293                       |               |
|              | Cardiac dysrhythmias                                   | 2086 | INSULIN      | 26409 (4157)  | Hemoglobin        | 13350 (5544)  | Septic shock              | 890 (757)     | Long-term use anticoagul  | 1355 (918)    |
|              | Essential hypertension                                 | 2021 | FURO40I      | 26080 (3380)  | Red Blood Cells   | 13315 (5504)  | Bacteremia                | 567 (505)     | Aortocoronary bypass      | 1221 (732)    |
|              | Heart failure                                          | 2003 | NACLFLUSH    | 22650 (4576)  | Hematocrit        | 13298 (5536)  | Convulsions               | 556 (409)     | Long-term use of insulin  | 1038 (635)    |
|              | Disorders of fluid, electrolyte, and acid-base balance | 1974 | VANCFIF      | 17958 (3645)  | Glucose           | 13035 (5463)  | Hypoxemia                 | 448 (402)     | Status-post ptca          | 850 (550)     |
|              | Diabetes mellitus                                      | 1787 | VANCOBASE    | 17943 (3646)  | Urea Nitrogen     | 10858 (4973)  | Ascites NEC               | 381 (281)     | History of tobacco use    | 822 (617)     |
|              | Other diseases of lung                                 | 1707 | NS1000       | 17761 (3528)  | Phosphate         | 10540 (5120)  | Diarrhea                  | 380 (328)     | Hx-ven thrombosis/embols  | 779 (488)     |
|              | Acute renal failure                                    | 1583 | NS500        | 17622 (3656)  | White Blood Cells | 10383 (5106)  | Abnrral coagultion prfile | 360 (319)     | Tracheostomy status       | 461 (302)     |
|              | Other and unspecified anemias                          | 1580 | D5W250       | 17454 (3670)  | PT                | 10195 (4871)  | Cardiogenic shock         | 288 (266)     | Status cardiac pacemaker  | 439 (265)     |
|              | Disorders of lipid metabolism                          | 1447 | HEPA5I       | 16454 (4536)  | Neutrophils       | 10154 (5011)  | Retention urine NOS       | 266 (235)     | Do not resuscitate status | 387 (301)     |
|              | Other forms of chronic ischemic heart disease          | 1356 | MAG2PM       | 15891 (2773)  | Calcium, Total    | 9986 (4941)   | Sleep apnea NOS           | 192 (141)     | Long-term use steroids    | 372 (266)     |

Table S1: Total number and top 10 diagnostics, prescriptions, lab tests, symptoms and conditions of all 5642 patients.

| Database   | N    | n(%)         |             |           |            |             |          |
|------------|------|--------------|-------------|-----------|------------|-------------|----------|
|            |      | Mean(SD)     | Gender      | Hispanic  | Black      | White       | Asian    |
| CareVue    | 2922 | 70.61 (53.2) | 1615 (55.3) | 81 (2.8)  | 333 (11.4) | 2150 (73.6) | 81 (2.8) |
| MetaVision | 2693 | 76.12 (55.0) | 1513 (56.2) | 137 (5.1) | 369 (13.7) | 1993 (74.0) | 66 (2.5) |
| Both or NA | 15   |              |             |           |            |             |          |

Table S2: Patient characteristics of database systems CareVue and MetaVision.

| Total Number | Diagnostic                                             | Freq | Prescription | Freq (Person) | Lab tests         | Freq (Person) | Symptom                    | Freq (Person) | Condition                 | Freq (Person) |
|--------------|--------------------------------------------------------|------|--------------|---------------|-------------------|---------------|----------------------------|---------------|---------------------------|---------------|
|              | 635                                                    |      | 2572         |               | 632               |               | 160                        |               | 253                       |               |
|              | Disorders of fluid, electrolyte, and acid-base balance | 1107 | NACLFLUSH    | 14763 (2680)  | Red Blood Cells   | 6783 (2667)   | Septic shock               | 563 (471)     | Long-term use anticoagul  | 980 (621)     |
|              | Essential hypertension                                 | 1047 | MAG2PDM      | 13576 (2253)  | Hemoglobin        | 6781 (2659)   | Hypoxemia                  | 350 (309)     | Long-term use of insulin  | 761 (422)     |
|              | Cardiac dysrhythmias                                   | 1038 | INSULIN      | 12588 (2067)  | Hematocrit        | 6728 (2658)   | Ascites NEC                | 344 (251)     | History of tobacco use    | 656 (472)     |
|              | Other and unspecified anemias                          | 916  | NS1000       | 11801 (2175)  | Glucose           | 6723 (2679)   | Bacteremia                 | 277 (244)     | Aortocoronary bypass      | 632 (347)     |
|              | Disorders of lipid metabolism                          | 912  | FURO40I      | 10813 (1610)  | Urea Nitrogen     | 5500 (2409)   | Diarrhea                   | 261 (223)     | Hx-ven thrombosis/embols  | 629 (377)     |
|              | Heart failure                                          | 901  | NS500        | 10188 (2062)  | Phosphate         | 5410 (2515)   | Abnormal coagultion prfile | 249 (213)     | Status-post ptca          | 527 (321)     |
|              | Diabetes mellitus                                      | 893  | VANCFIF      | 9978 (1941)   | Neutrophils       | 5336 (2466)   | Convulsions                | 184 (156)     | Do not resuscitate status | 387 (301)     |
|              | Other diseases of lung                                 | 847  | VANCOBASE    | 9970 (1942)   | White Blood Cells | 5141 (2460)   | Dysphagia NOS              | 160 (135)     | Renal dialysis status     | 354 (181)     |
|              | Acute renal failure                                    | 843  | HEPA5I       | 9890 (2436)   | PT                | 5111 (2360)   | Retention urine NOS        | 152 (134)     | Hx TLA /stroke w/o resid  | 315 (225)     |
|              | Chronic kidney disease                                 | 752  | NS250        | 7556 (1782)   | INR(PT)           | 5105 (2362)   | Tachycardia NOS            | 146 (131)     | Long-term use steroids    | 254 (170)     |

Table S3: Total number and top 10 diagnostics, prescriptions, lab tests, symptoms and conditions of 2693 patients from MetaVision.

| Total Number | Diagnostic                                             | Freq | Prescription | Freq (Person) | Lab tests         | Freq (Person) | Symptom                    | Freq (Person) | Condition                | Freq (Person) |
|--------------|--------------------------------------------------------|------|--------------|---------------|-------------------|---------------|----------------------------|---------------|--------------------------|---------------|
|              | 579                                                    |      | 2374         |               | 814               |               | 138                        |               | 207                      |               |
|              | Heart failure                                          | 1093 | FURO40I      | 15134 (1753)  | Hematocrit        | 6510 (2852)   | Convulsions                | 370 (251)     | Aortocoronary bypass     | 581 (383)     |
|              | Cardiac dysrhythmias                                   | 1042 | INSULIN      | 13644 (2065)  | Hemoglobin        | 6509 (2859)   | Septic shock               | 323 (282)     | Long-term use anticoagul | 372 (294)     |
|              | Essential hypertension                                 | 970  | D5W250       | 10228 (1896)  | Red Blood Cells   | 6472 (2811)   | Bacteremia                 | 288 (259)     | Status-post ptca         | 314 (224)     |
|              | Diabetes mellitus                                      | 884  | MAGS1I       | 9698 (1734)   | Glucose           | 6256 (2758)   | Prev matern surg aff NB    | 176 (142)     | Long-term use of insulin | 273 (210)     |
|              | Disorders of fluid, electrolyte, and acid-base balance | 859  | MICROK10     | 8889 (1809)   | Urea Nitrogen     | 5310 (2541)   | Cardiogenic shock          | 147 (135)     | Inf mcrg rstu pnulins    | 262 (222)     |
|              | Other diseases of lung                                 | 851  | NS250        | 7931 (1684)   | White Blood Cells | 5199 (2623)   | Sleep apnea NOS            | 146 (102)     | Tracheostomy status      | 228 (171)     |
|              | Acute renal failure                                    | 731  | VANCFIF      | 7913 (1683)   | Phosphate         | 5078 (2380)   | Diarrhea                   | 117 (103)     | Status cardiac pacemaker | 183 (119)     |
|              | Other and unspecified anemias                          | 658  | VANCOBASE    | 7905 (1683)   | PT                | 5040 (2487)   | Retention urine NOS        | 113 (100)     | Hx of breast malignancy  | 162 (91)      |
|              | Other forms of chronic ischemic heart disease          | 654  | NACLFLUSH    | 7747 (1869)   | Calcium, Total    | 4897 (2510)   | Abnormal coagultion prfile | 109 (104)     | History of tobacco use   | 162 (142)     |
|              | Septicemia                                             | 535  | KCL20PDM     | 7410 (1595)   | Neutrophils       | 4772 (2525)   | Fever NOS                  | 107 (96)      | Hx-ven thrombosis/embols | 148 (110)     |

Table S4: Total number and top 10 diagnostics, prescriptions, lab tests, symptoms and conditions of 2922 patients from CareVue.



|                                        | Proportion of First Training Data |             |             |             |             |             |             |
|----------------------------------------|-----------------------------------|-------------|-------------|-------------|-------------|-------------|-------------|
|                                        | 10%                               | 20%         | 30%         | 45%         | 60%         | 70%         | 80%         |
| Distributed NCE                        | 0.637(2e-3)                       | 0.612(4e-3) | 0.593(2e-3) | 0.581(2e-3) | 0.588(2e-3) | 0.610(2e-3) | 0.648(3e-3) |
| Distributed NCE with DP (10 clusters)  | 0.615(7e-3)                       | 0.586(8e-3) | 0.569(5e-3) | 0.557(5e-3) | 0.562(3e-3) | 0.577(6e-3) | 0.609(5e-3) |
| Distributed NCE with DP (30 clusters)  | 0.627(8e-3)                       | 0.606(7e-3) | 0.588(5e-3) | 0.570(5e-3) | 0.572(6e-3) | 0.582(6e-3) | 0.616(1e-2) |
| Distributed NCE with DP (50 clusters)  | 0.627(7e-3)                       | 0.600(6e-3) | 0.583(3e-3) | 0.567(6e-3) | 0.570(4e-3) | 0.582(5e-3) | 0.615(8e-3) |
| Distributed NCE with DP (100 clusters) | 0.621(7e-3)                       | 0.601(8e-3) | 0.586(5e-3) | 0.566(5e-3) | 0.568(5e-3) | 0.583(7e-3) | 0.606(1e-2) |
| Distributed NCE with DP (150 clusters) | 0.620(7e-3)                       | 0.599(4e-3) | 0.578(5e-3) | 0.563(7e-3) | 0.565(8e-3) | 0.578(7e-3) | 0.604(6e-3) |

Table S5: Precision-Top-K of Distributed NCE without or with DP. Results are summarized over 10-folds cross validation. *Skip-gram* model is used. Distributed NCE is Distributed Noise Contrastive Estimation. DP is Differential Privacy. The total proportion of training data is 90%. For example, if the proportion of first training data is 10%, the proportion of second training data should be 80%.

|          | Naive updates |                | Dropout updates |                | Distributed  |                |
|----------|---------------|----------------|-----------------|----------------|--------------|----------------|
|          | PTK           | <i>Avg_AUC</i> | PTK             | <i>Avg_AUC</i> | PTK          | <i>Avg_AUC</i> |
| 10:80:10 | 0.496 (2e-3)  | 0.770 (8e-3)   | 0.131 (9e-4)    | 0.720 (5e-3)   | 0.637 (2e-3) | 0.774 (8e-3)   |
| 20:70:10 | 0.532 (2e-3)  | 0.773 (7e-3)   | 0.162 (3e-3)    | 0.721 (7e-3)   | 0.612 (4e-3) | 0.774 (7e-3)   |
| 30:60:10 | 0.532 (3e-3)  | 0.772 (8e-3)   | 0.184 (9e-4)    | 0.722 (7e-3)   | 0.593 (2e-3) | 0.774 (7e-3)   |
| 45:45:10 | 0.516 (2e-3)  | 0.772 (8e-3)   | 0.219 (3e-3)    | 0.723 (7e-3)   | 0.581 (2e-3) | 0.773 (8e-3)   |
| 60:30:10 | 0.492 (3e-3)  | 0.774 (8e-3)   | 0.260 (3e-3)    | 0.724 (5e-3)   | 0.588 (2e-3) | 0.773 (8e-3)   |
| 70:20:10 | 0.483 (2e-3)  | 0.774 (8e-3)   | 0.307 (5e-3)    | 0.727 (6e-3)   | 0.610 (2e-3) | 0.773 (7e-3)   |
| 80:10:10 | 0.485 (3e-3)  | 0.775 (8e-3)   | 0.370 (4e-3)    | 0.736 (7e-3)   | 0.648 (3e-3) | 0.773 (7e-3)   |

Table S6: Simulation results of all methods using *Skip-Gram* model. Results are summarized over 10-folds cross validation. Distributed NCE is Distributed Noise Contrastive Estimation. PTK is Precision-Top-K. Avg-AUC is averaged Area-Under-Curve.  $n_{t1} : n_{t2} : n_{test}$  means that the two training datasets are  $n_{t1}\%$  and  $n_{t2}\%$  of total data. Testing dataset is  $n_{test}\%$  of total data.

|                | Age: Mean(std)     |                    | Naive updates |               | Dropout updates |               | Distributed NCE |               | Distributed NCE with DP (30 clusters) |               |
|----------------|--------------------|--------------------|---------------|---------------|-----------------|---------------|-----------------|---------------|---------------------------------------|---------------|
|                | Group <sub>1</sub> | Group <sub>2</sub> | PTK           | Avg-AUC       | PTK             | Avg-AUC       | PTK             | Avg-AUC       | PTK                                   | Avg-AUC       |
| $b_1 = -0.002$ | 77.7(1.0)          | 71.3(0.5)          | 0.5348 (4e-3) | 0.7742 (7e-3) | 0.1696 (2e-3)   | 0.7202 (8e-3) | 0.5961 (3e-3)   | 0.7757 (8e-3) | 0.5933 (3e-3)                         | 0.7757 (8e-3) |
| $b_1 = -0.02$  | 84.0(0.5)          | 58.4(0.5)          | 0.5036 (3e-3) | 0.7756 (8e-3) | 0.2272 (3e-3)   | 0.7230 (6e-3) | 0.5694 (2e-3)   | 0.7761 (8e-3) | 0.5575 (4e-3)                         | 0.7762 (7e-3) |
| $b_1 = -0.04$  | 79.0(0.2)          | 50.1(0.5)          | 0.4715 (5e-3) | 0.7763 (7e-3) | 0.2947 (5e-3)   | 0.7255 (6e-3) | 0.5909 (3e-3)   | 0.7753 (7e-3) | 0.5690 (6e-3)                         | 0.7758 (7e-3) |

Table S7: Simulation results of all methods using *Skip - Gram* model for age-divided populations. Distributed NCE is Distributed Noise Contrastive Estimation. PTK is Precision-Top-K. Avg-AUC is averaged Area-Under-Curve. Patients are assigned to Group<sub>1</sub> and Group<sub>2</sub> by  $Logit(Pr(S = 1)) = 1 + b_1 \times Age$ . Here  $S = 1$  means subject is assigned to Group<sub>2</sub>. Testing dataset is 10% of total data and is randomly chosen without age-correlation. Results are summarized over 10 simulation datasets.

|                                       | Age $\leq$ 53 : Age $>$ 53 |                | Age $\leq$ 66 : Age $>$ 66 |                | Age $\leq$ 77 : Age $>$ 77 |                |
|---------------------------------------|----------------------------|----------------|----------------------------|----------------|----------------------------|----------------|
|                                       | PTK                        | <i>Avg_AUC</i> | PTK                        | <i>Avg_AUC</i> | PTK                        | <i>Avg_AUC</i> |
| Naive updates                         | 0.5070                     | 0.7726         | 0.4897                     | 0.7700         | 0.4749                     | 0.7701         |
| Dropout updates                       | 0.1860                     | 0.7228         | 0.2700                     | 0.7285         | 0.3438                     | 0.7325         |
| Distributed NCE                       | 0.5730                     | 0.7748         | 0.5543                     | 0.7718         | 0.5907                     | 0.7704         |
| Distributed NCE with DP (30 clusters) | 0.5722                     | 0.7750         | 0.5451                     | 0.7722         | 0.5890                     | 0.7692         |

Table S8: Simulation results of all methods using *Skip – Gram* model for age-divided populations. Distributed NCE is Distributed Noise Contrastive Estimation. PTK is Precision-Top-K. Avg-AUC is averaged Area-Under-Curve. "Age  $\leq$  53 : Age  $>$  53" means that the two training datasets are divided by the age of subjects. One training dataset includes all subjects with age smaller than 53 and the other training dataset includes all subjects with age greater than 53. Testing dataset is 10% of total data and is randomly chosen without age-correlation.
